# Supplementary material for: Interference with pathways activated by topoisomerase inhibition alters the surface expression of PD-L1 and MHC I in colon cancer cells
Source: PubMed Central journal article supplement — Oncol Lett. 2022 Dec 9;25(1):41. doi: 10.3892/ol.2022.13628 (PMC9773314; doi:10.3892/ol.2022.13628), 2022-12-09

Figure S1. HCT116 cells were treated for 24 h with vehicle (DMSO), single agents (CPT, SM7, AZD, KU or VE822 at the concentrations indicated in the Materials and methods) or a combination of CPT and the pathway-inhibitor drugs. Cell cycle profiles of treated cells were analyzed by propidium iodide flow cytometry. Arrows point to the sub-G<sub>1</sub> population. The percentage of the sub-G<sub>1</sub> population from three technical replicates is shown as bar graphs in Fig. 1C. DMSO, dimethyl sulfoxide; CPT, camptothecin; SM7, SM-7366; AZD, AZD7762; KU, KU60019; DDR, DNA-damage response.

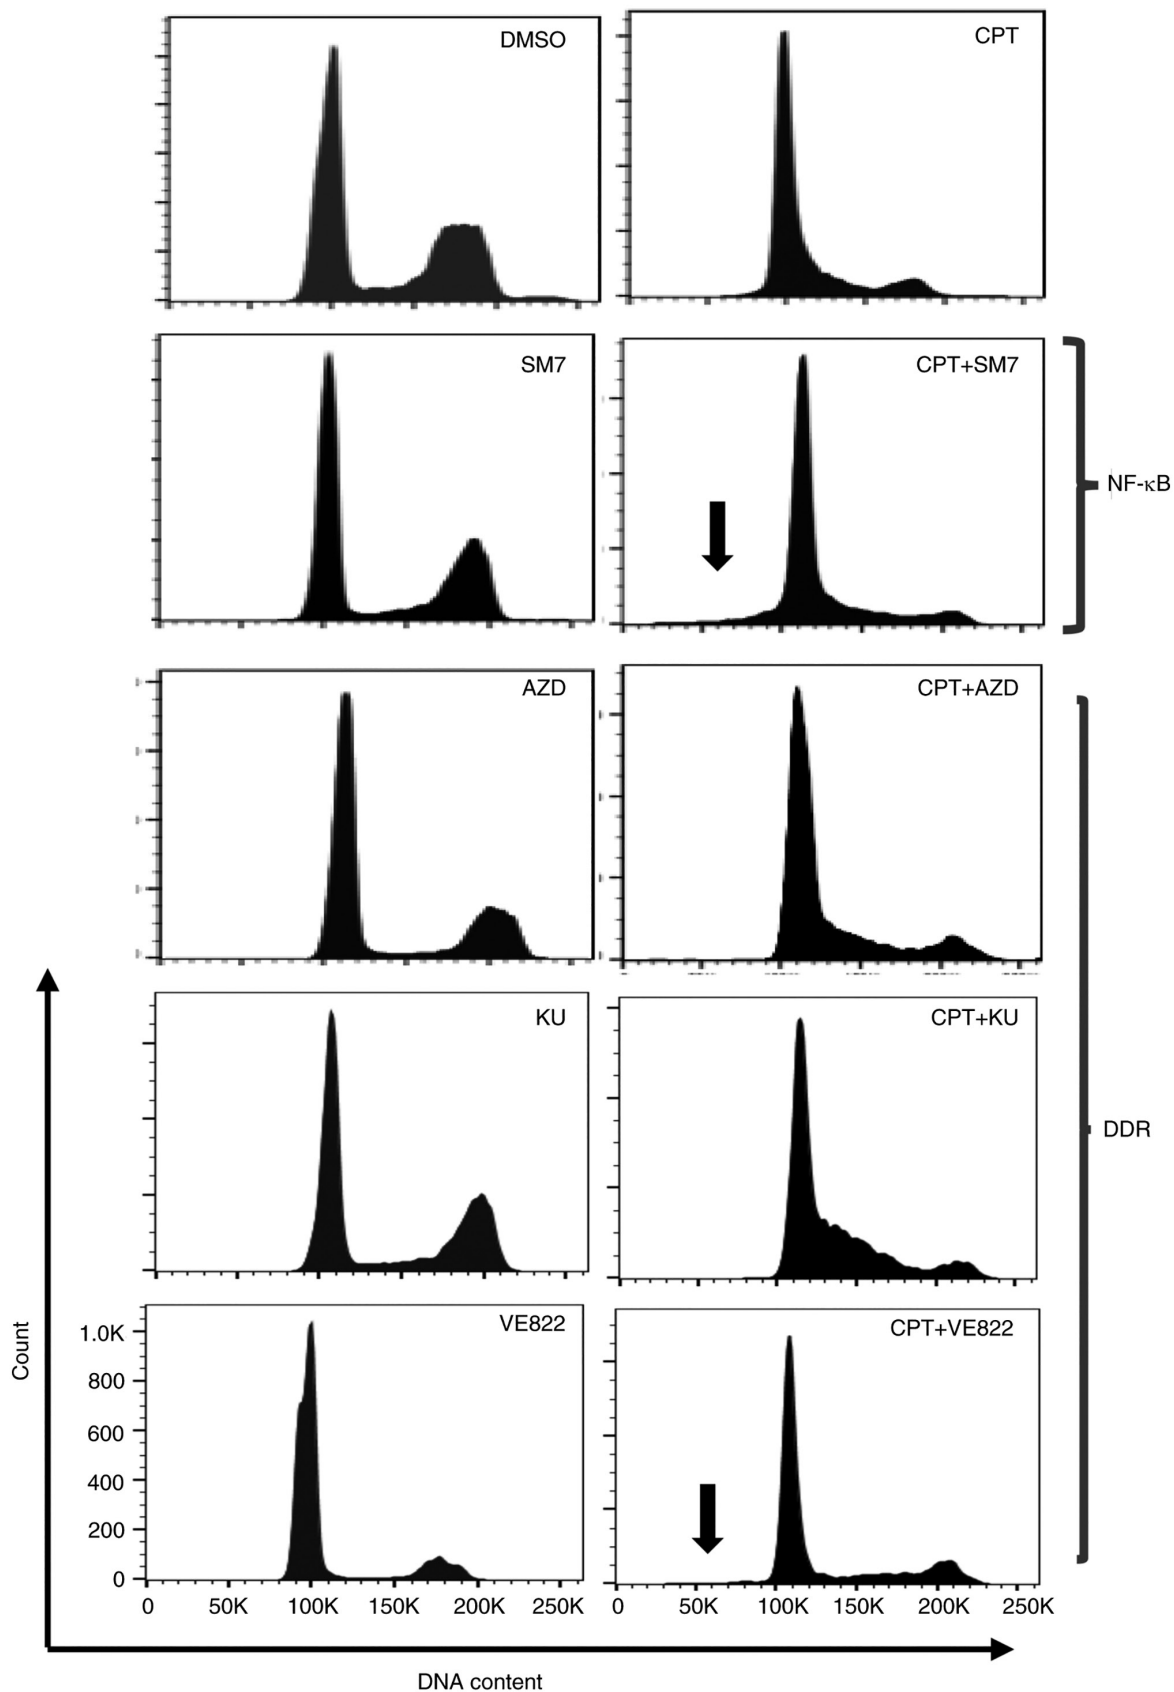

Supplement: Supplementary_Data.pdf [file Supplementary_Data.pdf]
